# Supplementary material
Source: HighWire-hosted journal article supplement (https://oem.bmj.com/content/78/6/409)
Supplement: inline-supplementary-material-1 [file inline-supplementary-material-1.pdf]

**Supplementary Table 1.** Characteristics of the study population before the transition to retirement (n=689).

| Characteristic                                 | Women      | Men        |
|------------------------------------------------|------------|------------|
| n (%)                                          | 587 (85)   | 102 (15)   |
| Age, mean (SD)                                 | 63.2 (1.6) | 63.3 (1.4) |
| Occupational status, n (%)                     |            |            |
| Manual                                         | 202 (34)   | 30 (29)    |
| Non-manual                                     | 385 (66)   | 72 (71)    |
| Current smoking, n (%)                         |            |            |
| No                                             | 521 (94)   | 95 (97)    |
| Yes                                            | 37 (6)     | 3 (3)      |
| Body mass index, n (%)                         |            |            |
| Normal weight <sup>a</sup>                     | 222 (39)   | 29 (30)    |
| Overweight                                     | 220 (39)   | 48 (49)    |
| Obese                                          | 123 (22)   | 21 (21)    |
| Number of chronic diseases, n (%) <sup>b</sup> |            |            |
| 0                                              | 138 (28)   | 24 (29)    |
| 1                                              | 198 (41)   | 26 (32)    |
| ≥2                                             | 149 (31)   | 32 (39)    |
| Limitations in walking 2 km, n (%)             |            |            |
| No                                             | 497 (87)   | 82 (83)    |
| Minor                                          | 55 (10)    | 14 (14)    |
| Major                                          | 18 (3)     | 3 (3)      |

<sup>a</sup> Included 3 (0.5%) underweight women and no underweight men.

<sup>b</sup> Following current chronic diseases taken into account: angina pectoris, myocardial infarction, or cerebrovascular disease, diabetes, osteoarthritis, osteoporosis, sciatica, fibromyalgia, rheumatoid arthritis, asthma, chronic bronchitis.
